# Supplementary material
Source: PubMed Central journal article supplement (PMC11626274)
Supplement: ajcr0014-5286-f7.pdf [file ajcr0014-5286-f7.pdf]

## Functional analysis of progranulin in GC

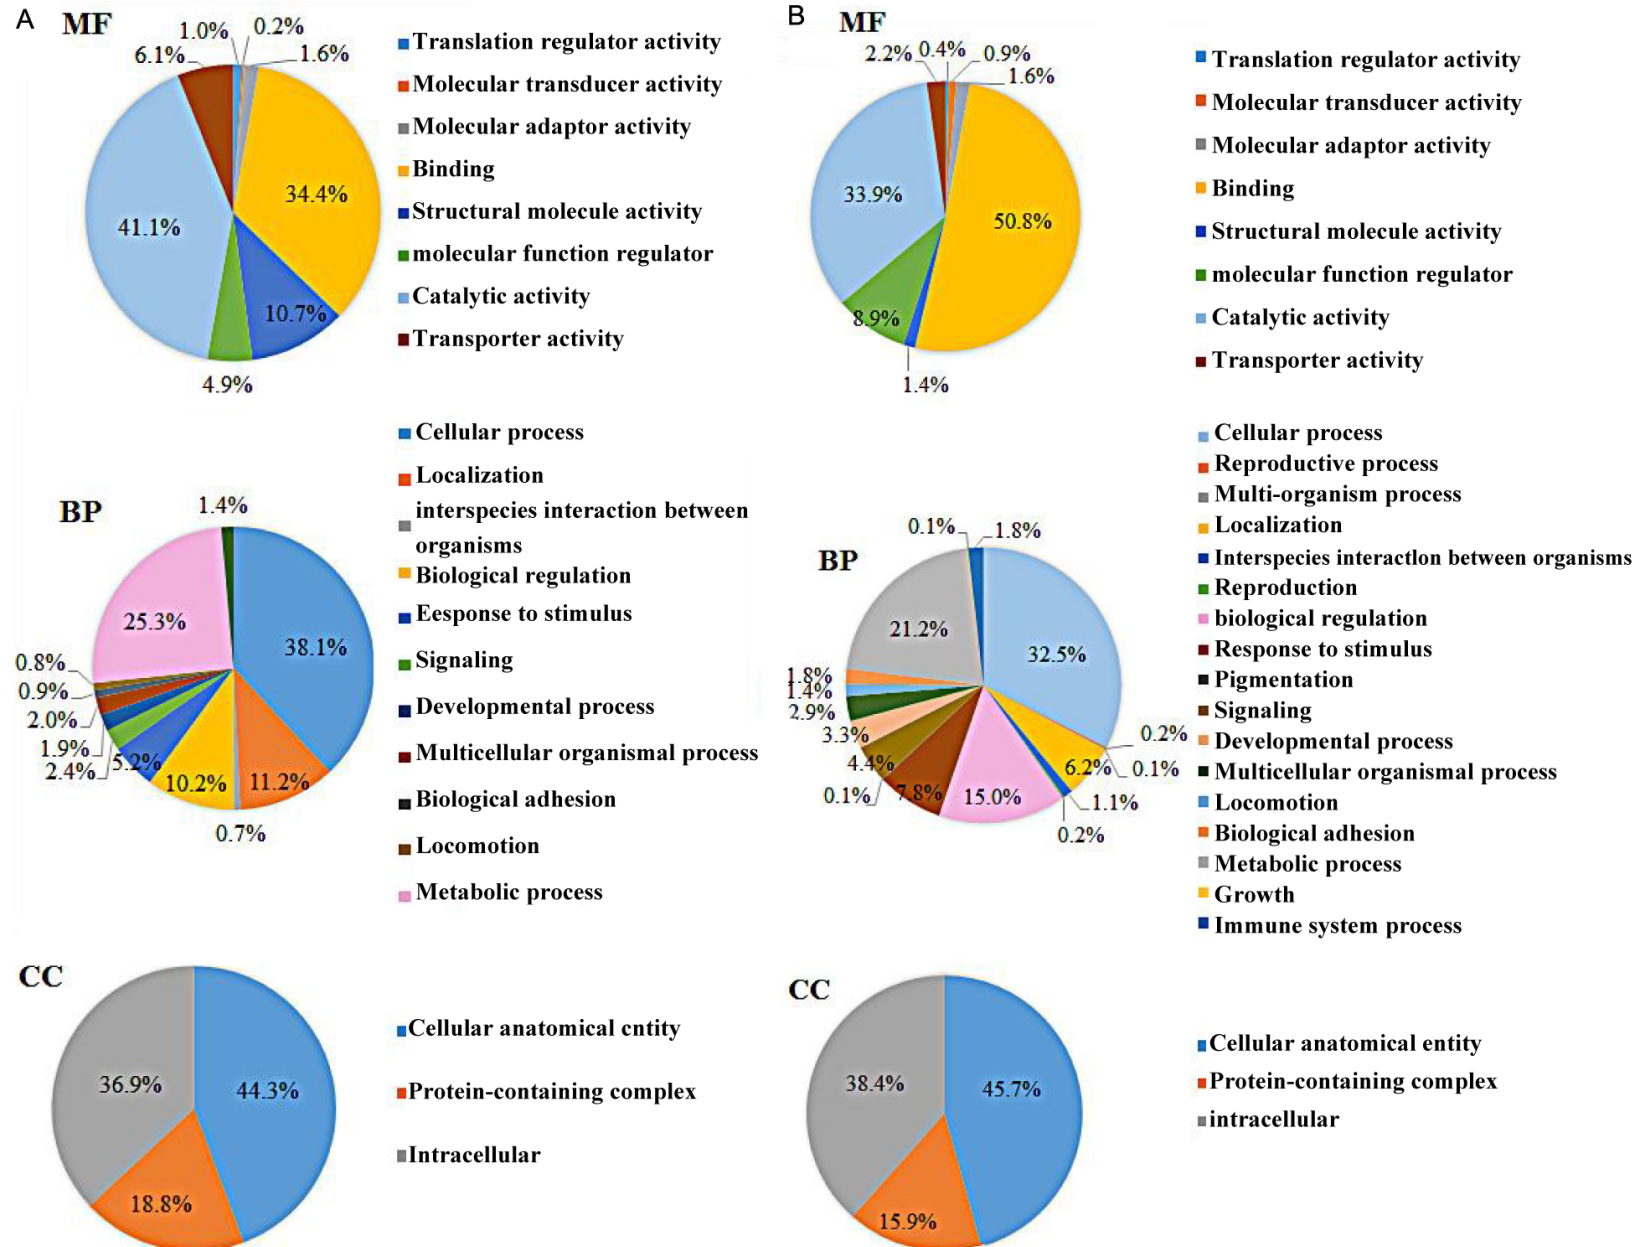

Figure S1. GO annotation analysis of differentially expressed proteins.
